# Supplementary material for: Advances in pretreatment and analysis methods of aromatic hydrocarbons in soil
Source: Royal Society of Chemistry journal article supplement (doi:10.1039/d1ra08633b), 2022-01-01
Supplement: d1ra08633b1.pdf [file d1ra08633b1.pdf]

## Supporting Information

### Advances in Pretreatment and Analysis Methods of Aromatic Hydrocarbons in Soil

Na Song, Yonghui Tian, Zewei Luo, Jianxiong Dai\*, Yan Liu, Yixiang Duan\*

*Research Center of Analytical Instrumentation, Key Laboratory of Synthetic and Natural Functional Molecule Chemistry of Ministry of Education, College of Chemistry & Materials Science, Northwest University, Xi'an, 710069, Shaanxi, P.R.China;*

*\*Corresponding author: Jianxiong Dai, Yixiang Duan*

*Research Center of Analytical Instrumentation, Northwest University, 1 Xuefu Ave., Xi'an, 710075, Shaanxi Province, China*

*E-mail address: yduan@nwu.edu.cn*

## Supporting Table

Table S-1. Physicochemical properties, toxicity and the pollution risk guidance values of common monocyclic aromatic hydrocarbons and their ramification and PAHs in soil.

| NO.                                                        | Chemical Name<br>Abbreviation | Chemical<br>Structure                                                               | Physical Description                                          | Physicochemical Properties                                                                                                                                   | Pollution Risk Guidance Values(mg/kg) |                 | Toxicity                                                                                               |
|------------------------------------------------------------|-------------------------------|-------------------------------------------------------------------------------------|---------------------------------------------------------------|--------------------------------------------------------------------------------------------------------------------------------------------------------------|---------------------------------------|-----------------|--------------------------------------------------------------------------------------------------------|
|                                                            |                               |                                                                                     |                                                               |                                                                                                                                                              | Residential Land                      | Industrial Land |                                                                                                        |
| <b>A) Monocyclic aromatic hydrocarbons and derivatives</b> |                               |                                                                                     |                                                               |                                                                                                                                                              |                                       |                 |                                                                                                        |
| 1                                                          | Benzene                       |    | Achromaticity and clarity<br>Volatile liquid<br>Aromatic odor | (1) BP: 80 °C<br>(2) MP: 5.5 °C<br>(3) 1.7 g/1L Water; Soluble in alcohol, ether, acetone, chloroform, gasoline and other organic solvents<br>(4) LogP: 2.03 | 0.064                                 | 0.26            | Carcinogen: Group 1<br>LD50: Rat transoral 3306 mg/kg<br>Mouse transdermal 48 mg/kg                    |
| 2                                                          | Toluene                       |    | Colorless transparent Liquid<br>Aromatic odor                 | (1) BP: 110.6 °C<br>(2) MP: -95 °C<br>(3) 0.52 g/1L Water; Miscible in benzene, alcohol, ether and other organic solvents<br>(4) LogP: 2.52                  | 120                                   | 672             | Carcinogen: Group 3<br>LD50: Rat transoral 5000 mg/kg<br>71.4 g/m3 human inhalation, short term lethal |
| 3                                                          | Ethybenzene                   |   | Colorless oily liquid<br>Aromatic odor                        | (1) BP: 136.2 °C<br>(2) MP: -94 °C<br>(3) 0.16 g/1L Water; Miscible in benzene, alcohol, ether and other organic solvents<br>(4) LogP: 3.17                  | 0.2                                   | 0.81            | Carcinogen: Group 2A<br>LD50: Rat transoral 3500 mg/kg<br>Rabbit Transdermal 5 g/kg                    |
| 4                                                          | <i>o</i> -Xylene<br>(oX)      |  | Colorless transparent; Liquid<br>Aromatic odor                | (1) BP: 144.4 °C<br>(2) MP: -25.2°C<br>(3) 0.178g/1L Water; Soluble in ethanol, ether, chloroform and other organic solvents<br>(4) LogP: 3.14               | 2.63                                  | 14.1            | Carcinogen: Group 3<br>Human inhalation 6125 ppm/12h<br>Rat oral 5 mg/kg                               |
| 5                                                          | <i>m</i> -Xylene<br>(mX)      |  | Colorless transparent liquid;<br>Smell similar to toluene     | (1) BP: 139.1°C<br>(2) MP: -47.9 °C                                                                                                                          | 2.63                                  | 14.1            | Carcinogen: Group 2B<br>LD50 : Rat transoral 5000 mg/kg                                                |

|    |                          |                                                                                     |                                                                                   |                                                                                                                                                                                                                                                               |      |      |                                                                                                                          |
|----|--------------------------|-------------------------------------------------------------------------------------|-----------------------------------------------------------------------------------|---------------------------------------------------------------------------------------------------------------------------------------------------------------------------------------------------------------------------------------------------------------|------|------|--------------------------------------------------------------------------------------------------------------------------|
| 6  | <i>p</i> -Xylene<br>(pX) | 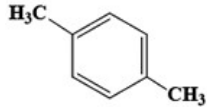   | Colorless liquid; Colorless lamellar or prismatic crystal                         | (3) 0.162 g/1L Water; Soluble in ethanol, ether, chloroform and other organic solvents<br>(4) LogP: 3.14<br>(1) BP: 139.61 °C<br>(2) MP: 13.26 °C<br>(3) 0.198 g/1L Water; Soluble in ethanol, ether, chloroform and other organic solvents<br>(4) LogP: 3.14 | 2.63 | 14.1 | Rabbit transdermal 14100 mg/kg<br>Rat intraperitoneal 1739 mg/kg<br>Carcinogen: Group 3                                  |
| 7  | Benzenamine              |    | Colorless to light yellow transparent liquid                                      | (1) BP: 184 °C<br>(2) MP: -6.3 °C<br>(3) 3.6 g/0.1L Water (20 °C)<br>Soluble in ethanol, ether and other organic solvents<br>(4) LogP: 1.23                                                                                                                   | 5.92 | 32.5 | Carcinogen: Group 3<br>Rat intraperitoneal 420 mg/kg<br>Mouse intraperitoneal 492 mg/kg                                  |
| 8  | Styrene                  |    | Colorless and transparent oily liquid<br>Aromatic odor                            | (1) BP: 145 °C<br>(2) MP: -31 °C<br>(3) Soluble in alcohol, ether and other organic solvents<br>(4) LogP: 2.03                                                                                                                                                | 36.5 | 235  | Carcinogen: Group 2B<br>LD50: Rat transoral 5000 mg/kg<br>LC50: Rat inhalation 24000 mg/m3, 4h                           |
| 9  | Nitrobenzene             |  | Colorless or yellowish oily liquid<br>Bitter almond flavor                        | (1) BP: 210.9 °C<br>(2) MP: 5.7 °C<br>(3) 1.9 g/1L Water (20 °C); Density greater than water<br>Soluble in ethanol, ether, benzene and oil<br>(4) LogP: 1.83                                                                                                  | 0.99 | 4.25 | Carcinogen: Group 2B<br>LD50: Rat transoral 489 mg/kg<br>Rat transdermal 2100 mg/kg<br>Human (female) transoral 200mg/kg |
| 10 | 2,4-Dinitrotoluene       |  | Yellow needle crystal<br>Monoclinic prism<br>Industrial product is an oily liquid | (1) BP: 300 °C<br>(2) MP: 65.5-70.5 °C<br>(3) Soluble in benzene; Slightly soluble CS <sub>2</sub> ;<br>Slightly soluble in ether, cold ethanol; Very slightly soluble in                                                                                     | 1.54 | 4.68 | Carcinogen: Group 2B<br>LD50: Rat oral 268 mg/kg<br>Mouse oral 790 mg/kg                                                 |

|                                                    |                            |                                                                                     |                                                               |                                                                                                                                                                                                               |       |      |                                                                                                                                                                |
|----------------------------------------------------|----------------------------|-------------------------------------------------------------------------------------|---------------------------------------------------------------|---------------------------------------------------------------------------------------------------------------------------------------------------------------------------------------------------------------|-------|------|----------------------------------------------------------------------------------------------------------------------------------------------------------------|
| 11                                                 | Chlorobenzene              | 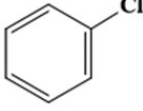   | Colorless liquid<br>Bitter almond flavor                      | water<br>(4) LogP: 2.2<br>(1) BP: 132.2 °C<br>(2) MP: -45 °C<br>(3) 0.049 g/100g Water (30 °C); Soluble in ethanol, ether, chloroform, CS <sub>2</sub> , benzene and other organic solvents<br>(4) LogP: 2.52 | 1.31  | 7.06 | Carcinogen: Group 3<br>LD50: Rat transoral 2290 mg/kg<br>Mouse transoral 1445mg/kg                                                                             |
| 12                                                 | 1,2-Dichlorobenzene        |    | Colorless and volatile liquid<br>Aromatic odor                | (1) BP: 180.4 °C<br>(2) MP: -17.5 °C<br>(3) Soluble in most organic solvents such as alcohol and ether; Insoluble in water<br>(4) LogP: 2.52                                                                  | 11.4  | 73.5 | Carcinogen: Group 2B<br>LD50: Rat subcutaneous 5mg/kg<br>Rabbit intravenous 400 mg/kg                                                                          |
| 13                                                 | 1,4-Dichlorobenzene        |    | White crystal<br>Irritating smell                             | (1) BP: 174 °C<br>(2) MP: 53.1 °C<br>(3) Soluble in ethanol, ether, benzene and other organic solvents<br>Insoluble in water<br>(4) LogP: 3.15                                                                | 0.079 | 0.39 | Carcinogen: Group 2B<br>LD50: Rat transoral 500 mg/kg                                                                                                          |
| <b>B) Polycyclic aromatic hydrocarbons (USEPA)</b> |                            |                                                                                     |                                                               |                                                                                                                                                                                                               |       |      |                                                                                                                                                                |
| 14                                                 | *Naphthalene<br>(Nap)      |  | A white crystalline volatile solid with a strong coal-tar     | (1) BP:217.9 °C<br>(2) MP:80.5 °C<br>(3)1 g/13ml ethanol or methanol; Very soluble in ether<br><br>hydronaphthalenes and in fixed and volatile oils<br>(4) LogP: 3.3                                          | 0.48  | 2.13 | Carcinogen: Group 2B<br>LD50: Guinea pig oral 1200 mg/kg<br>Mouse intraperitoneal 150 mg/kg and oral 316 mg/kg<br>Rat oral 490 mg/kg<br>Rabbit oral 3000 mg/kg |
| 15                                                 | *1,2-Benzanthrene<br>(BaA) |  | Colorless solid and solutions have a slight blue fluorescence | (1) BP:437.6 °C<br>(2) MP:162 °C<br>(3) In water,0.0094 mg/L at 25 °C                                                                                                                                         | 0.63  | 1.86 | Carcinogen: Group 2B<br>LD50: Rat intraperitoneal >200 mg/kg                                                                                                   |

|    |                                      |                                                                                     |                                                                                                                                                                  |                                                                                                                                                                              |       |      |                                                                   |
|----|--------------------------------------|-------------------------------------------------------------------------------------|------------------------------------------------------------------------------------------------------------------------------------------------------------------|------------------------------------------------------------------------------------------------------------------------------------------------------------------------------|-------|------|-------------------------------------------------------------------|
| 16 | *Benzo[a]pyrene<br>(BaP)             | 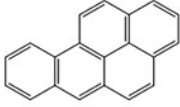   | Colorless to yellowish<br>acicular crystal                                                                                                                       | (4) LogP: 5.76<br>(1) BP:496 °C<br>(2) MP:178.3 °C<br>(3) In water,0.00162 mg/L at 25 °C<br>Slightly soluble in ethanol and methanol                                         | 0.064 | 0.19 | Carcinogen: Group 1<br>LD50: Rat subcutaneous<br>50 mg/kg         |
| 17 | *Benzo[b]fluoranthene<br>(BbF)       |    | Needles or yellow<br>fluffy powder                                                                                                                               | (4) LogP: 5.34<br>(1) BP:481 °C<br>(2) MP:168 °C<br>(3) 0.0015 mg/1L in Water                                                                                                | 0.64  | 1.87 | Carcinogen: Group 2B                                              |
| 18 | *Benzo[k]fluoranthene<br>(BkF)       |    | Pale yellow needles or<br>yellow crystalline solid<br>Neat                                                                                                       | (4) LogP: 5.34<br>(1) BP:480 °C<br>(2) MP:216 °C<br>(3) 95% ethanol: <1 mg/mL at 20°C;1.09 µg/L at 25 °C                                                                     | 6.2   | 18   | Carcinogen: Group 2B                                              |
| 19 | Chrysene<br>(Chr)                    |    | White or silvery gray<br>yellow green scales<br>green scales or orthorhombic<br>Forming colorless rhombic<br>lamellae in benzene<br>Purple fluorescence under UV | (4) LogP: 6.11<br>(1) BP:448 °C<br>(2) MP:253 °C<br>(3) 1 g/1.3L anhydrous ethanol;1 g/0.48L methanol (25 °C)<br>Dissolve about 5% in toluene at 100 °C; insoluble in water. | 61.5  | 178  | Carcinogen: Group 2B<br>LD50: Mouse intraperitoneal<br>>320 mg/kg |
| 20 | Dibenzo[a,h]anthracene<br>(DBahA)    |  | White crystals or<br>pale yellow solid                                                                                                                           | (4) LogP: 6.03<br>(1) BP:524 °C<br>(2) MP:259 °C<br>(3) In water,0.00249 mg/L at 25 °C                                                                                       | 0.064 | 0.19 | Carcinogen: Group 2B                                              |
| 21 | *Indeno[1,2,3-cd]pyrene<br>(InP/IcP) |  | Yellow flaky or needle-like<br>crystals<br>Light green fluorescence                                                                                              | (4) LogP: 5.66<br>(1) BP:536 °C<br>(2) MP:164 °C<br>(3) 0.6 mg/2ml lolive oil;0.0062 mg/L Water (20 °C)                                                                      | 0.64  | 1.87 | Carcinogen: Group 2B<br>Carcinogen: Group 3                       |

|    |                                |                                                                                     |                                                             |                                                                                                      |                                                                                      |
|----|--------------------------------|-------------------------------------------------------------------------------------|-------------------------------------------------------------|------------------------------------------------------------------------------------------------------|--------------------------------------------------------------------------------------|
| 22 | *Benzo[g,h,i]perylene<br>(BgP) |    | Colorless to white<br>crystalline solid                     | (1) BP: 550 °C<br>(2) MP:278.3 °C<br>(3) In water, 0.00026 mg/L at 25 °C<br>(4) LogP: 6.50           |                                                                                      |
| 23 | Acenaphthene<br>(Ace)          |    | White needle-<br>like crystals                              | (1) BP:279 °C<br>(2) MP:95 °C<br>(3) In water, 3.90 mg/L at 25 °C<br>(4) LogP: 3.92                  | Carcinogen: Not listed<br>LD50: Rat intraperitoneal 600 mg/kg                        |
| 24 | Acenaphthylene<br>(Acy)        |    | Yellow prismatic or<br>plate-like crystals                  | (1) BP:78 °C<br>(2) MP:280 °C<br>(3) In water, 3.93 mg/L at 25 °C<br>(4) LogP: 3.93                  | Carcinogen: Group 3<br>LD50: Mouse oral 1760 mg/kg<br>Rat intraperitoneal 1700 mg/kg |
| 25 | Fluorene<br>(Fl)               |    | White flaky crystals                                        | (1) BP:294 °C<br>(2) MP:114.77 °C<br>(3) In water, 1.69 mg/L at 25 °C<br>(4) LogP:4.18               | Carcinogen: Group 3<br>LD50: Mouse intraperitoneal >2000 mg/kg                       |
| 26 | Phenanthrene<br>(Phe)          |    | Colorless monoclinic crystals<br>with a faint aromatic odo  | (1) BP:340 °C<br>(2) MP:97~101 °C<br>(3) In water, 1.10 mg/L at 25 °C<br>(4) LogP:4.46               | Carcinogen: Group 3<br>LD50: Mouse intraperitoneal<br>700 mg/kg and oral 700 mg/kg   |
| 27 | Anthracene<br>(Ant)            |  | Pale yellow needle- like<br>crystals with blue fluorescence | (1) BP:340 °C<br>(2) MP:215 °C<br>(3) In water, 0.0434 mg/L at 24 °C<br>(4) LogP:4.45                | Carcinogen: Group 3<br>LD50: Mouse vein 430 mg/kg                                    |
| 28 | *Fluoranthene<br>(Flu)         |  | Yellow-green needle-like<br>or flaky crystals               | (1) BP:384 °C<br>(2) MP:110 °C<br>(3) Virtually insoluble (0.20-0.26 mg/L) in water<br>(4) LogP:5.16 | Carcinogen: Group 3<br>LD50: Mouse intraperitoneal<br>100 mg/kg; Rat oral 2000 mg/kg |

29 Pyrene  
(Pyr)

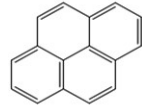

Pale yellow monoclinic  
crystals

- (1) BP:393.5 °C
- (2) MP:156 °C
- (3) In water, 0.135mg/L at 24 °C
- (4) LogP:4.88

Carcinogen: Group 3  
LD50: Mouse intraperitoneal  
514 mg/kg and oral 800 mg/kg  
Rat oral 2700 mg/kg

---
